# Supplementary material for: The effect of virtual reality on temporal bone anatomy evaluation and performance
Source: Springer Nature journal article supplement (doi:10.1007/s00405-021-07183-9), 2021-11-27
Supplement: MOESM1 [file 19906576]

Supporting information 1. List of anatomical landmarks in the identification task

---

| Anatomical landmark                |                                         |
|------------------------------------|-----------------------------------------|
| Carotid artery                     | Oval window                             |
| Sigmoid sinus                      | Internal acoustic meatus                |
| Jugular bulb                       | Lateral semicircular canal (prominence) |
| Tympanic tegmen/dura lamel         | Superior semicircular canal             |
| Sinodural angle                    | Posterior semicircular canal            |
| Facial nerve (mastoid/vertical)    | Vestibulum (utricle)                    |
| Facial nerve (tympanic/horizontal) | Umbo                                    |
| Geniculate ganglion                | Corpus of incus                         |
| Facial nerve (labyrinthine)        | Incudomalleolar joint                   |
| Facial nerve (meatal)              | Scutum                                  |
| Cochlea apex                       | Cochlear aqueduct                       |
| Round window                       | Vestibular aqueduct (saccus)            |

---
