# Supplementary material for: The effect of virtual reality on temporal bone anatomy evaluation and performance
Source: Springer Nature journal article supplement (doi:10.1007/s00405-021-07183-9), 2021-11-27
Supplement: MOESM2 [file 19906576]

## Supporting information 2. Measured anatomical distances and their clinical relevance.

| Anatomical measurements:                                              | Indication for measured distance:                                                                                                  |
|-----------------------------------------------------------------------|------------------------------------------------------------------------------------------------------------------------------------|
| Length of malleus (manubrium+head)                                    | Universal measurement, easy to compare, no direct surgical relevance.                                                              |
| Distance from body of incus to mastoid cortex                         | The estimate for drilling depth, e.g. in mastoidectomy.                                                                            |
| Horizontal diameter of bony ear canal (external meatus)               | Estimation of drilling work during canaloplasty.                                                                                   |
| Vertical diameter of bony ear canal (internal meatus)                 | Estimation of tympanic membrane diameter, universal anatomic measurement.                                                          |
| Size of facial recess                                                 | Space for posterior tympanotomy.                                                                                                   |
| Distance from facial recess to mastoid cortex                         | The estimate for drilling depth regarding the facial nerve.                                                                        |
| Distance from facial nerve (mastoid part) to recess of bony ear canal | Limit of posterior drilling in canaloplasty.                                                                                       |
| Diameter of oval window                                               | Stapedotomy, stapedectomy. Identification of the oval window area and surgical access to stapes footplate.                         |
| Diameter of round window                                              | Cochlear implantation and active middle ear implantation. Identification of round window area and evaluation of surgical approach. |
| Length of styloid process                                             | Universal anatomical measurement, stylalgia.                                                                                       |
| Distance from sigmoid sinus to back wall of bony ear canal            | The space available for drilling in e.g. mastoidectomy.                                                                            |
